# Supplementary figures and images for: CD19-directed chimeric antigen receptor T cell therapy in Waldenström macroglobulinemia: a preclinical model and initial clinical experience
Source: PubMed Central journal article supplement — J Immunother Cancer. 2022 Feb 16;10(2):e004128. doi: 10.1136/jitc-2021-004128 (PMC8852764; doi:10.1136/jitc-2021-004128), 2022-02-16

## Supplemental Figure 1

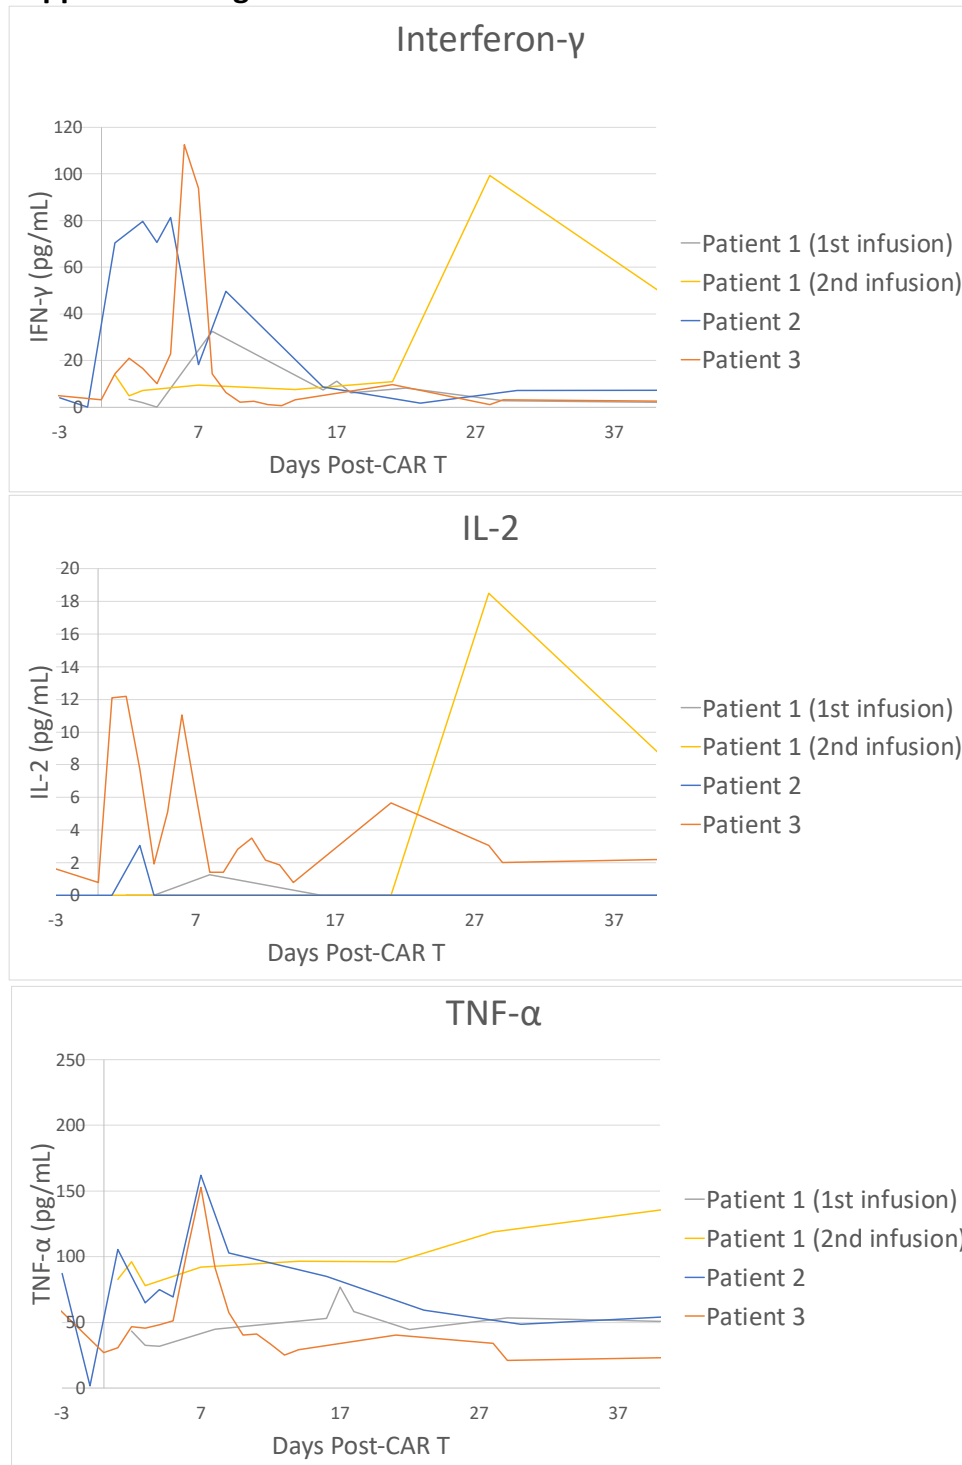

Supplement: jitc-2021-004128supp002.pdf [file jitc-2021-004128supp002.pdf]

**Supplemental Figure 2**

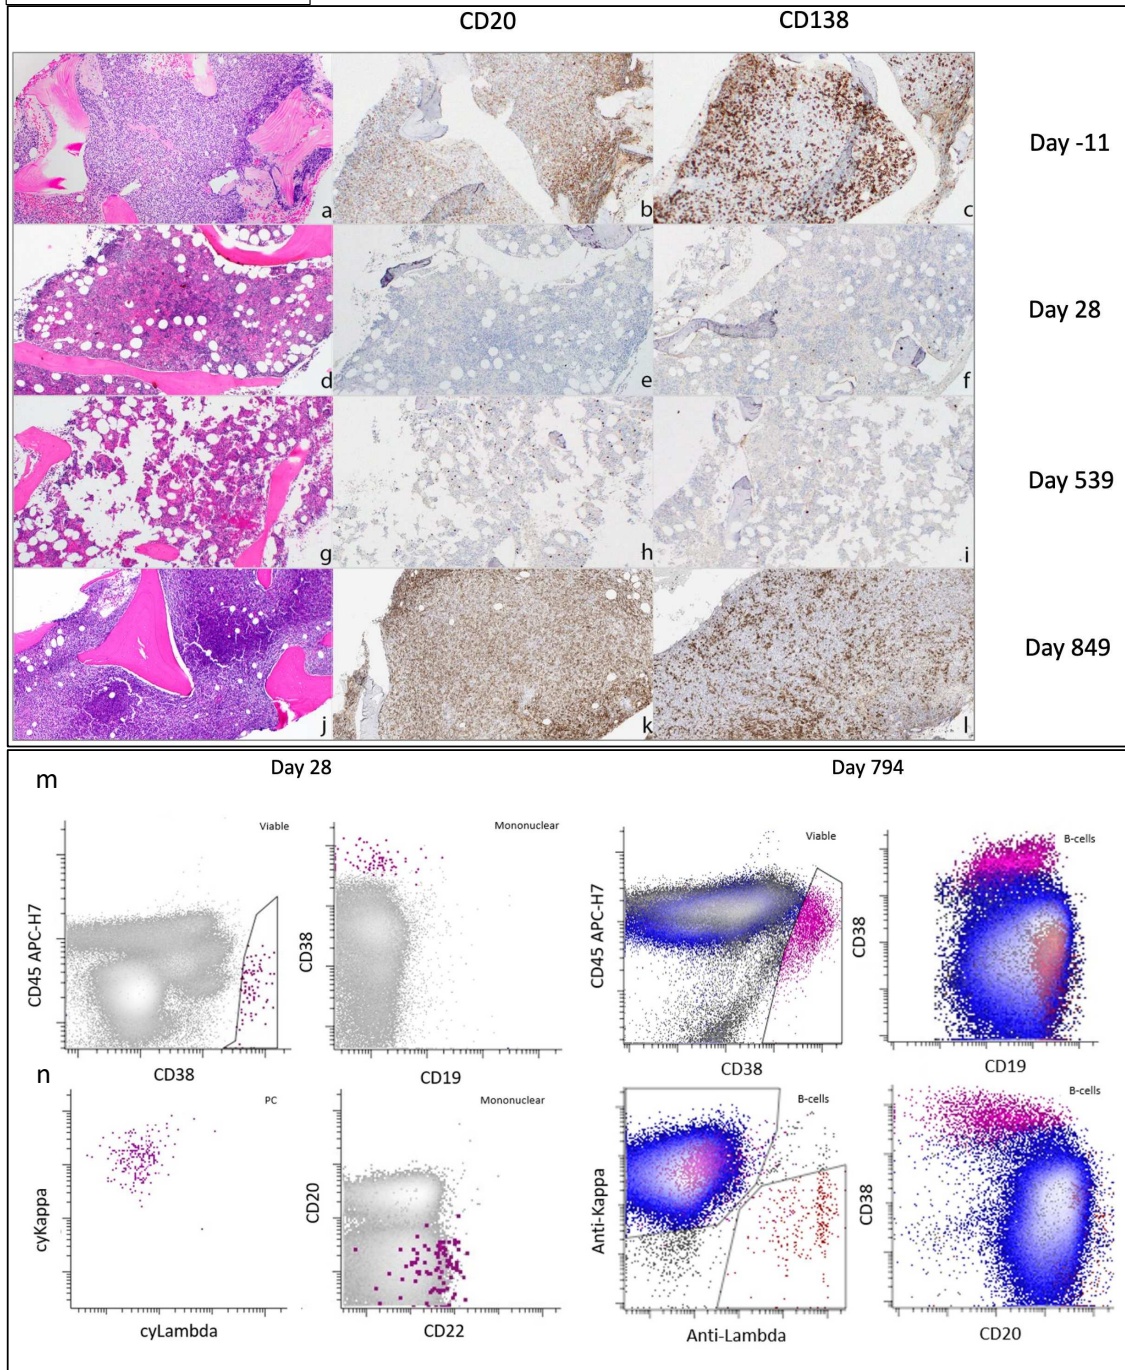

Supplement: jitc-2021-004128supp003.pdf [file jitc-2021-004128supp003.pdf]
